# Supplementary material for: Chemical and Colloidal Stability of Polymer-Coated NaYF4:Yb,Er Nanoparticles in Aqueous Media and Viability of Cells: The Effect of a Protective Coating
Source: MDPI journal article supplement (doi:10.3390/ijms24032724), 2023-02-01
Supplement: s1 [file s1]

## Supporting information

# Chemical and Colloidal Stability of Polymer-Coated NaYF<sub>4</sub>:Yb,Er Nanoparticles in Aqueous Media and Viability of Cells: The Effect of a Protective Coating

Mykhailo Nahorniak <sup>1</sup>, Vitalii Patsula <sup>1</sup>, Dana Mareková <sup>2,3</sup>, Petr Matouš <sup>4</sup>, Oleksandr Shapoval <sup>1</sup>, Viktoriia Oleksa <sup>1</sup>, Magda Vosmanská <sup>5</sup>, Lucia Machová Urdzíková <sup>2</sup>, Pavla Jendelová <sup>2,3</sup>, Vít Herynek <sup>4</sup>  
and Daniel Horák <sup>1,\*</sup>

<sup>1</sup> Institute of Macromolecular Chemistry, Czech Academy of Sciences, Heyrovského nám. 2, 160 00 Prague, Czech Republic; nahorniak@imc.cas.cz (M.N.); patsula@imc.cas.cz (V.P.); shapoval@imc.cas.cz (O.S.); oleksa@imc.cas.cz (V.O.)

<sup>2</sup> Institute of Experimental Medicine, Czech Academy of Sciences, Vídeňská 1083, 142 20 Prague, Czech Republic; dana.marekova@iem.cas.cz (D.M.); lucia.machova@iem.cas.cz (L.M.U.); pavla.jendelova@iem.cas.cz (P.J.)

<sup>3</sup> Department of Neurosciences, Second Faculty of Medicine, Charles University, V Úvalu 84, 150 06 Prague, Czech Republic

<sup>4</sup> Center for Advanced Preclinical Imaging, First Faculty of Medicine, Charles University, Salmovská 3, 120 00, Prague, Czech Republic; petr.matous@lf1.cuni.cz (P.M.); vit.herynek@lf1.cuni.cz (V.H.)

<sup>5</sup> Department of Analytical Chemistry, University of Chemistry and Technology Prague, Technická 5, Prague 6, 166 28 Prague, Czech Republic; magda.vosmanska@vscht.cz

\* Correspondence: horak@imc.cas.cz

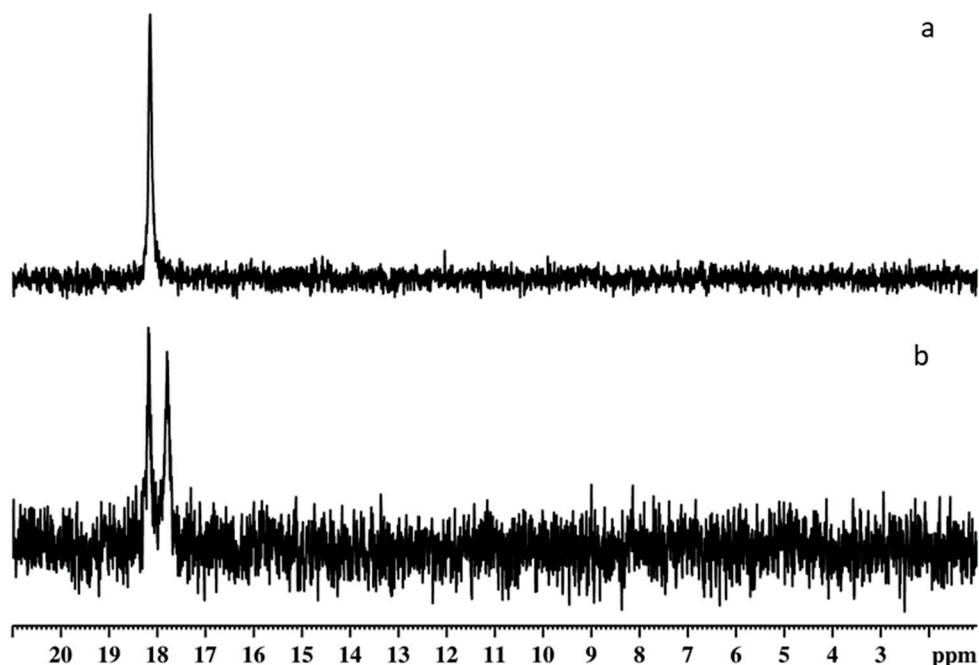

**Figure S1.** <sup>31</sup>P NMR spectra of (a) P(DMA-AEC-Boc)-Ale and (b) P(DMA-AEA)-Ale copolymers.

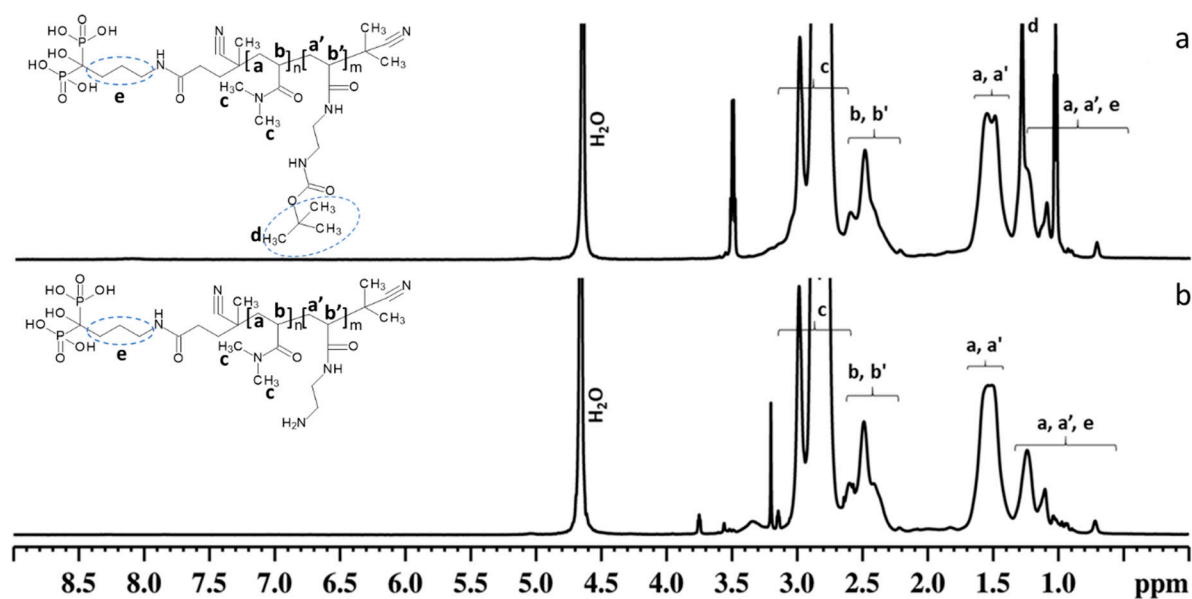

**Figure S2.**  $^1\text{H}$  NMR spectra of (a) P(DMA-AEC-Boc) and (b) P(DMA-AEA)-Ale copolymers.

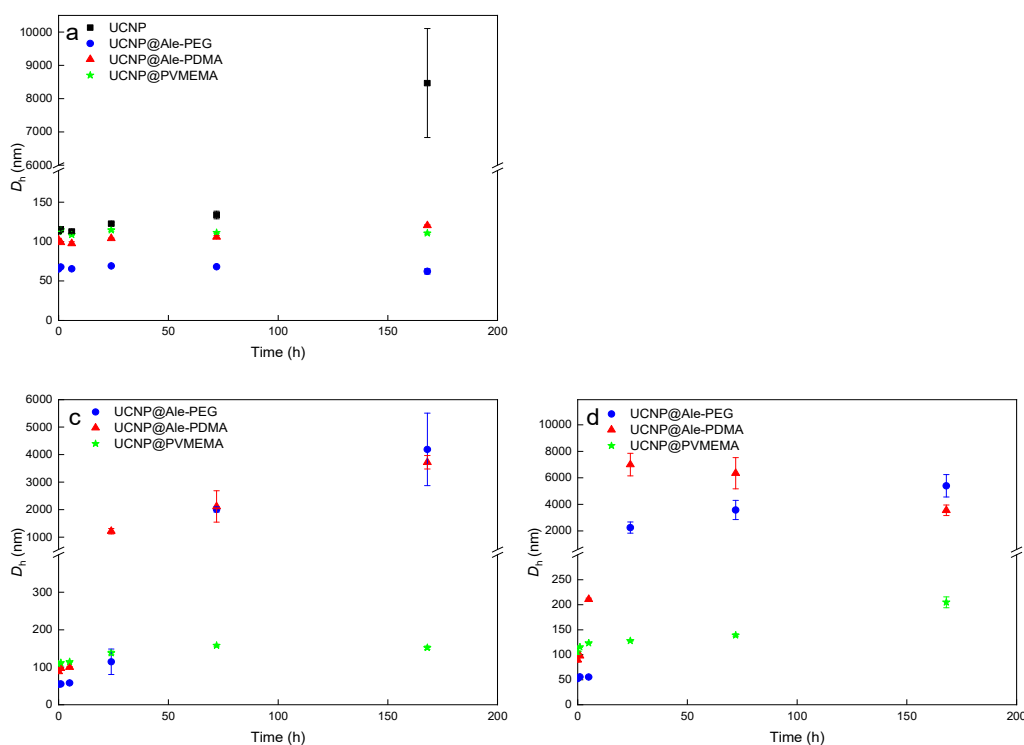

**Figure S3.** Time dependence of hydrodynamic diameter ( $D_h$ ) of differently coated UCNPs in (a, b) water and (c, d) PBS (pH 7.4) at (a, c) 25 and (b, d) 37 °C.

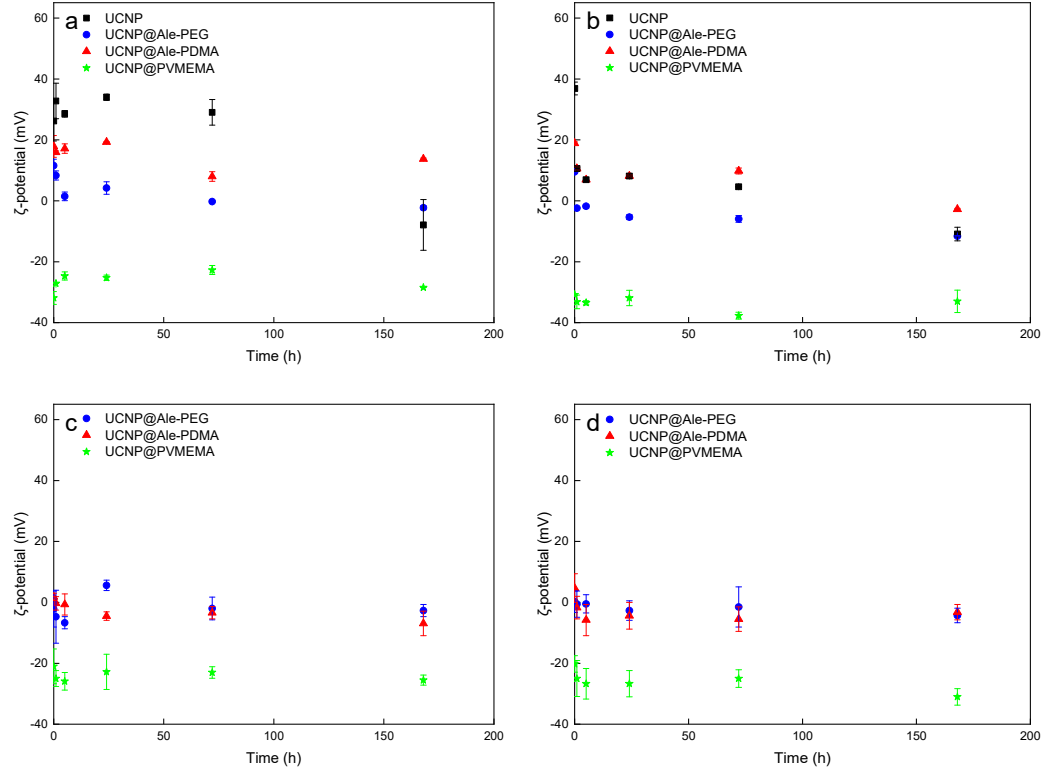

**Figure S4.** Time dependence of  $\zeta$ -potential of differently coated UCNPs in (a, b) water and (c, d) PBS (pH 7.4) at (a, c) 25 and (b, d) 37 °C.

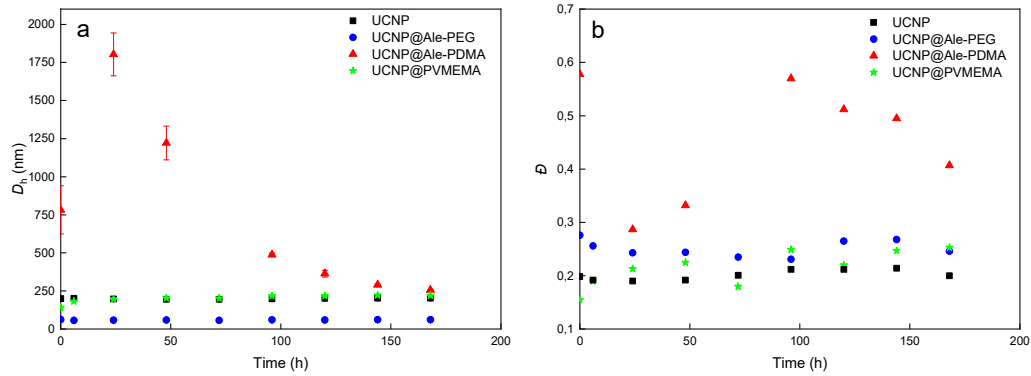

**Figure S5.** Time dependence of (a) hydrodynamic diameter  $D_h$  and (b) dispersity  $D$  of differently coated UCNPs in Dulbecco's modified Eagle's medium at 37 °C.

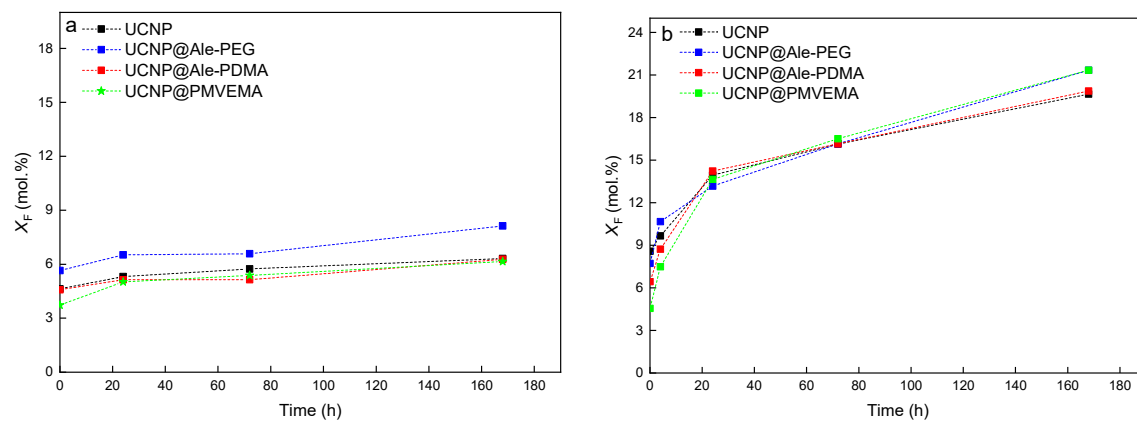

**Figure S6.** Time dependence of  $F^-$  molar fraction ( $X_F$ ) of differently coated UCNPs in (a) Dulbecco's modified Eagle's medium and (b) artificial lysosomal fluid at 37 °C.
